# Supplementary material for: Identification of Persuasive Antiviral Natural Compounds for COVID-19 by Targeting Endoribonuclease NSP15: A Structural-Bioinformatics Approach
Source: MDPI journal article supplement (doi:10.3390/molecules25235657), 2020-12-01
Supplement: s1 [file s1]

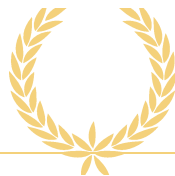

We certify that the following article

**Identification of persuasive anti-viral natural compounds for COVID-19 by targeting endoribonuclease NSP15: A structural bioinformatics approach**

**Mohd Saeed**

has undergone English language editing by MDPI. The text has been checked for correct use of grammar and common technical terms, and edited to a level suitable for reporting research in a scholarly journal.

MDPI uses experienced, native English speaking editors. Full details of the editing service can be found at  
► <https://www.mdpi.com/authors/english>.

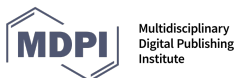

Basel, Switzerland  
September 2020

A handwritten signature in black ink, appearing to read "Shu-Kun Lin".

Dr. Shu-Kun Lin  
Publisher & President  
MDPI
